# Supplementary material for: Label-Free Liquid Chromatography–Mass Spectrometry Quantitation of Relative N- and O-Glycan Concentrations in Human Milk in Japan
Source: MDPI journal article supplement (doi:10.3390/ijms25031772), 2024-02-01
Supplement: s1 [file s1]

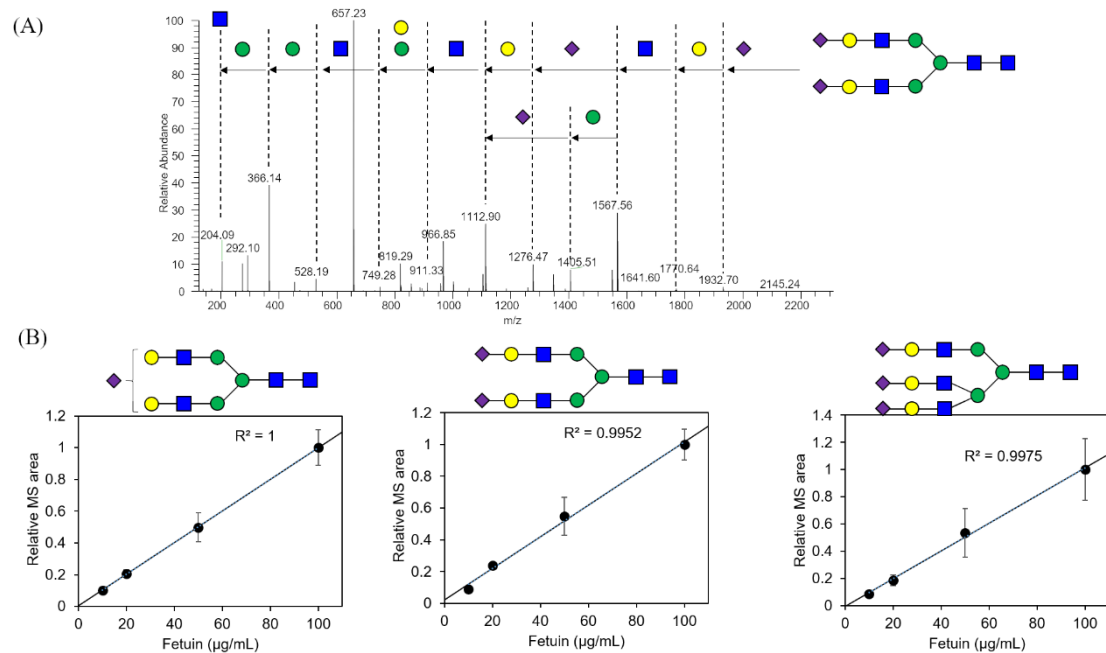

Figure S1. Label-free LC/MS analysis of bovine fetuin *N*-glycan. (A) MS/MS spectrum disialylated biantennary complex-type glycan. (B) Relationship between LC/MS area of three representative *N*-glycans of fetuin and the concentration of fetuin. The relative LC/MS area was set to 1 when 100  $\mu\text{g/mL}$  of fetuin was used. The color symbols are as follows: green circle, Man; yellow square, GalNAc; yellow circle, Gal; blue square, GlcNAc, purple diamond, Neu5Ac.

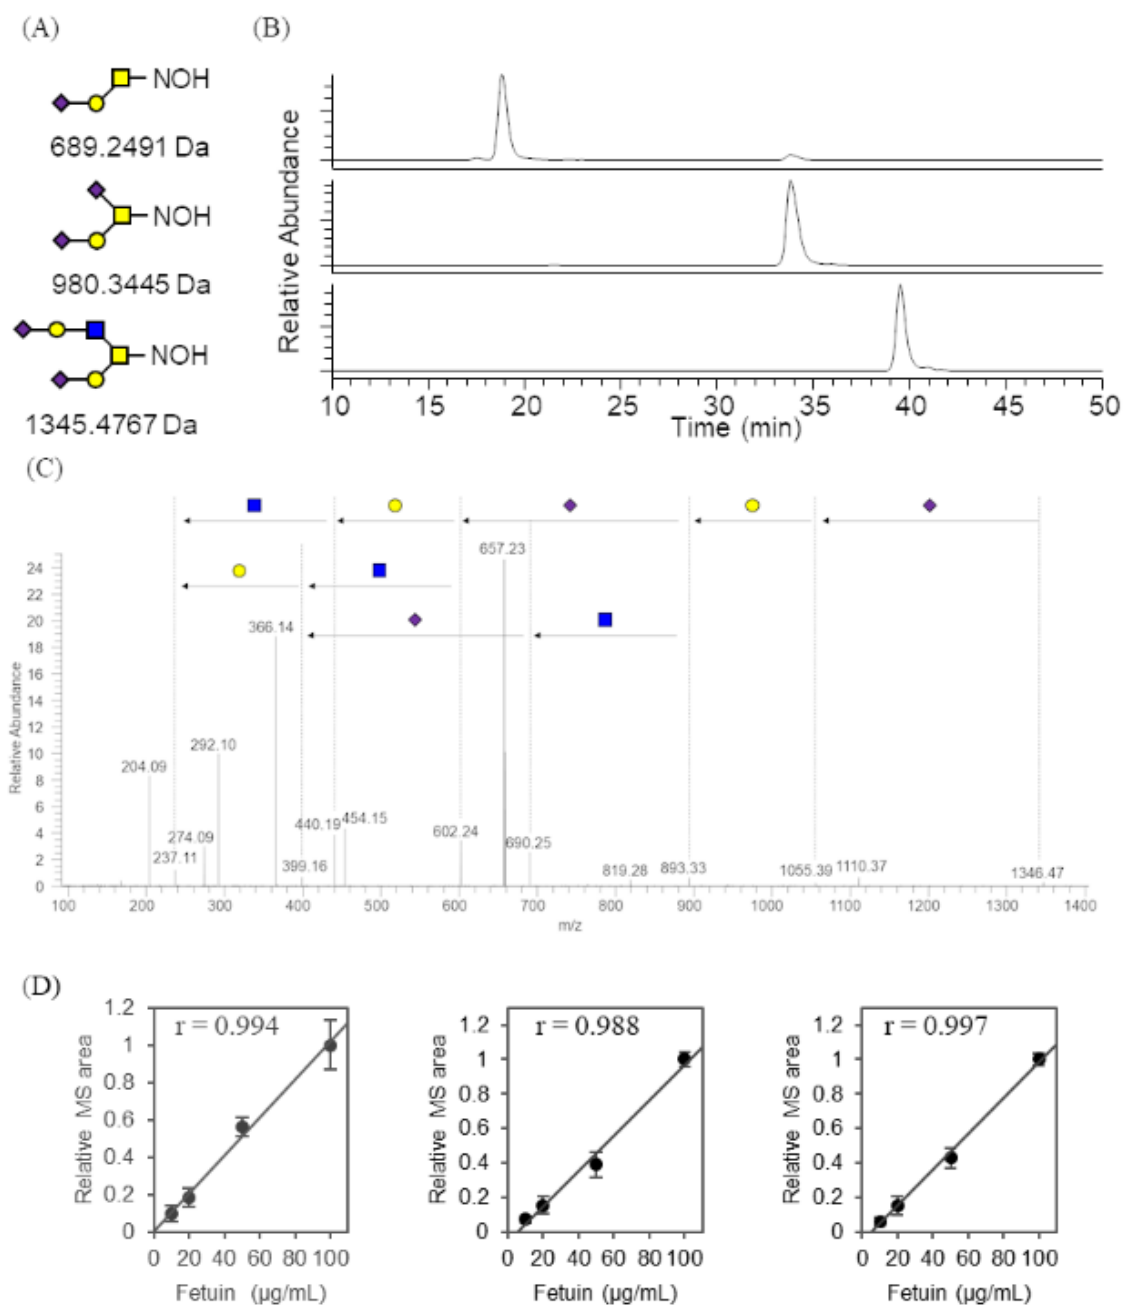

Figure S2. Label-free LC/MS analysis of bovine fetuin *O*-glycan. (A) Structures of oximated *O*-glycans released from bovine fetuin by eliminative oximation. The reducing end of released *O*-glycan is oximated (NOH). The numbers below the structures indicate the monoisotopic mass of each *O*-glycan. (B) Extracted ion current chromatograms at  $m/z$  690.25 (top), 981.35 (middle), and 1346.48 (bottom). Oximated *O*-glycans released from 100  $\mu\text{g/mL}$  of fetuin solution were applied to GlycanPac AXH-1 (Thermo Fisher Scientific) and eluted with ammonium formate (pH 4.4)/acetonitrile at a flow rate of 0.4 mL/min. MS chromatogram was acquired in the range of  $m/z$  400-2000. (C) MS/MS spectrum at  $m/z$  1346.48 corresponding to

Neu5Ac $\alpha$ 2,3Gal $\beta$ 1,4(Neu5Ac $\alpha$ 2,3Gal $\beta$ 1,4GlcNAc $\beta$ 1,6)GalNAc. (D) Relationship between LC/MS area of oximated *O*-glycans with *m/z* 690.25 (left), 981.35 (center), and 1346.48 (right) and the fetuin concentration. The relative LC/MS area was set to 1 when 100  $\mu$ g/mL of fetuin was used. The color symbols are as follows: yellow square, GalNAc; yellow circle, Gal; blue square, GlcNAc, purple diamond, Neu5Ac.

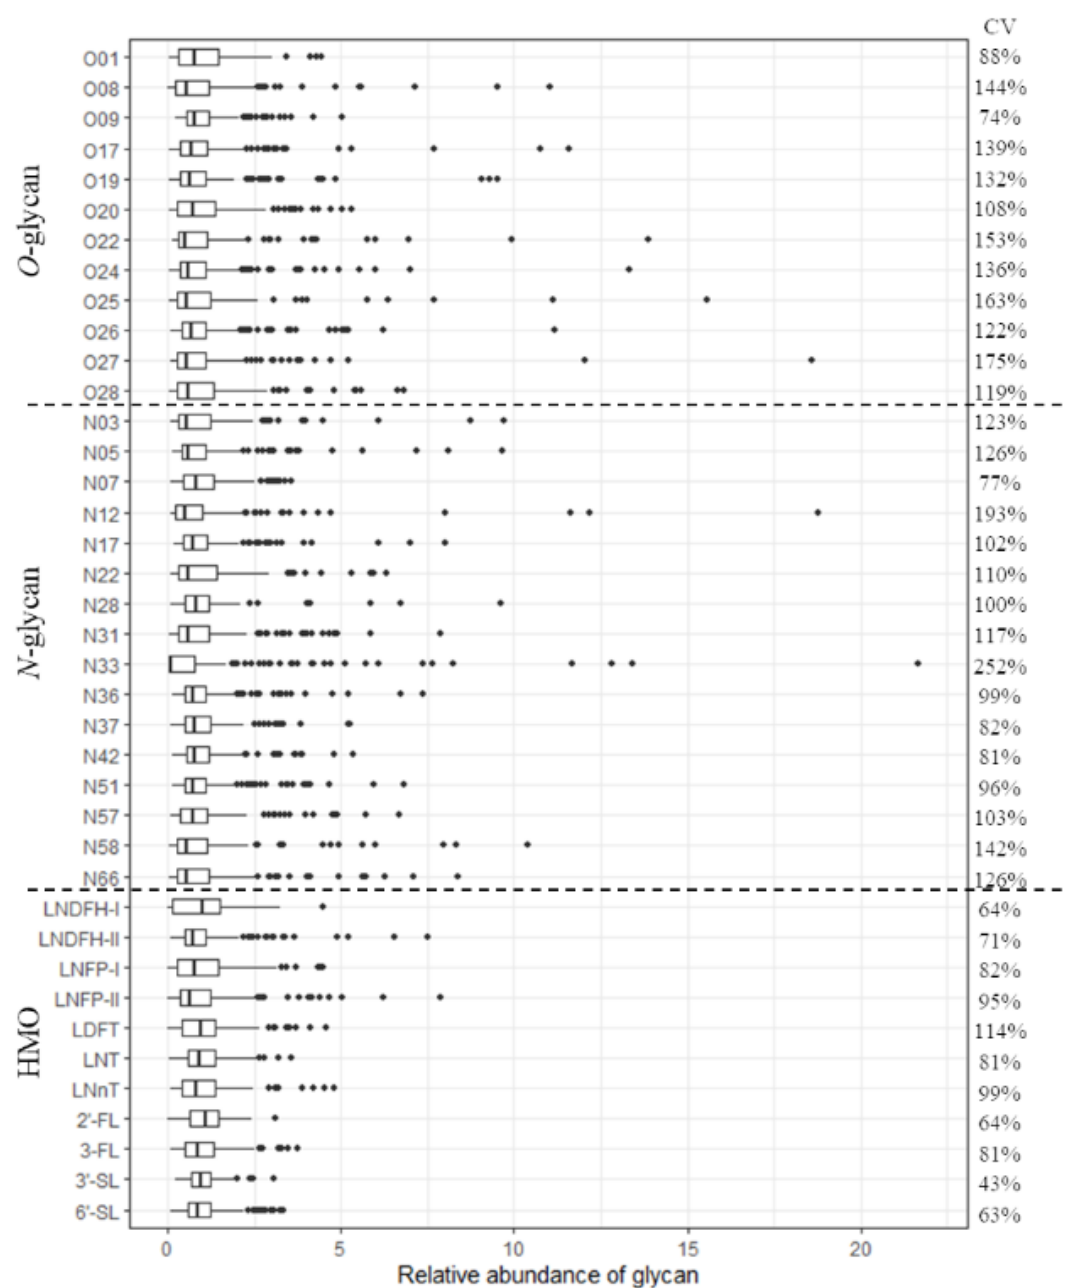

Figure S3. Relative concentration of *N*-glycans, *O*-glycans, and HMOs in 200 samples of human milk. The relative concentration of each glycan was normalized to a mean of 1. The numbers on the right side of the box plot represent the coefficient of variation (CV) of each glycan

Table S1. Concentration of *N*-glycans and *O*-glycans\*, and absolute concentration of HMOs (mg/L) in 200 samples of human milk

|                        | Mean  | Range       | SD    | Median | IQR**         | skewness |
|------------------------|-------|-------------|-------|--------|---------------|----------|
| <u><i>O</i>-glycan</u> |       |             |       |        |               |          |
| O01                    | 3.12  | 0.087-13.9  | 2.76  | 2.314  | 0.906-4.515   | 1.27     |
| O08                    | 0.465 | 0.002-5.13  | 0.67  | 0.245  | 0.097-0.537   | 3.79     |
| O09                    | 39.3  | 7.51-197.9  | 29.2  | 29.637 | 21.631-46.769 | 2.39     |
| O17                    | 2.15  | 0.063-25.0  | 2.99  | 1.412  | 0.777-2.403   | 4.95     |
| O19                    | 30.5  | 0.706-290.1 | 40.1  | 18.463 | 11.196-32.375 | 4.30     |
| O20                    | 1.48  | 0.019-7.83  | 1.59  | 1.04   | 0.386-1.973   | 1.73     |
| O22                    | 5.39  | 0.531-74.7  | 8.25  | 2.602  | 1.619-5.996   | 4.87     |
| O24                    | 15.3  | 0.211-203.7 | 20.9  | 8.845  | 5.635-16.404  | 5.03     |
| O25                    | 55.3  | 0.873-860.6 | 89.9  | 29.888 | 13.475-68.679 | 5.62     |
| O26                    | 3.12  | 0.209-34.8  | 3.80  | 2.104  | 1.282-3.377   | 4.41     |
| O27                    | 0.312 | 0.017-5.81  | 0.545 | 0.169  | 0.083-0.334   | 6.75     |
| O28                    | 0.689 | 0.007-4.69  | 0.819 | 0.399  | 0.18-0.899    | 2.44     |
| <u><i>N</i>-glycan</u> |       |             |       |        |               |          |
| N03                    | 0.194 | 0.018-1.89  | 0.239 | 0.108  | 0.063-0.238   | 3.86     |
| N05                    | 0.034 | 0.004-0.328 | 0.043 | 0.020  | 0.013-0.037   | 3.89     |
| N07                    | 0.032 | 0.002-0.115 | 0.025 | 0.027  | 0.014-0.042   | 1.35     |
| N12                    | 0.424 | 0.023-7.96  | 0.817 | 0.213  | 0.095-0.428   | 6.16     |
| N17                    | 0.070 | 0.013-0.558 | 0.071 | 0.050  | 0.03-0.078    | 3.77     |
| N22                    | 0.166 | 0.012-1.05  | 0.182 | 0.095  | 0.05-0.23     | 2.41     |
| N28                    | 0.495 | 0.032-4.76  | 0.496 | 0.395  | 0.247-0.591   | 5.05     |
| N31                    | 0.440 | 0.010-3.46  | 0.514 | 0.258  | 0.13-0.519    | 2.57     |
| N33                    | 1.16  | 0.013-25.2  | 2.94  | 0.085  | 0.046-0.881   | 4.75     |
| N36                    | 0.983 | 0.096-7.24  | 0.969 | 0.691  | 0.477-1.066   | 3.53     |
| N37                    | 0.570 | 0.048-2.99  | 0.469 | 0.422  | 0.28-0.704    | 2.29     |
| N42                    | 3.43  | 0.407-18.3  | 2.76  | 2.65   | 1.815-4.082   | 2.58     |
| N51                    | 0.612 | 0.072-4.18  | 0.585 | 0.432  | 0.3-0.657     | 3.03     |
| N57                    | 1.10  | 0.100-7.33  | 1.13  | 0.765  | 0.403-1.255   | 2.70     |
| N58                    | 0.184 | 0.004-1.92  | 0.262 | 0.103  | 0.047-0.206   | 3.69     |
| N66                    | 0.239 | 0.006-2.00  | 0.301 | 0.133  | 0.066-0.285   | 2.94     |
| <u>HMO</u>             |       |             |       |        |               |          |
| LNDFH-I                | 299.6 | 0-1335.5    | 244.0 | 296.6  | 32.8-448      | 0.72     |
| LNDFH-II               | 119.3 | 8.4-893.2   | 118.1 | 85.0   | 55.9-130.5    | 3.47     |

|         |       |             |       |        |              |       |
|---------|-------|-------------|-------|--------|--------------|-------|
| LNFP-I  | 331.5 | 0.70-1485.8 | 315.5 | 254.5  | 85.5-482     | 1.32  |
| LNFP-II | 522.9 | 0-4123      | 593.8 | 332.4  | 172-642.9    | 2.62  |
| LDFT    | 186.6 | 0-855.5     | 153.3 | 178.3  | 73.4-252.3   | 1.33  |
| LNT     | 619.5 | 17.4-2211   | 398.6 | 558.4  | 345.2-841.8  | 1.02  |
| LNnT    | 73.7  | 4.7-354.1   | 60.0  | 58.1   | 30.1-101.4   | 1.82  |
| 2'-FL   | 1419  | 0-4426.7    | 912.1 | 1517.3 | 898.3-2053.3 | -0.03 |
| 3-FL    | 625.3 | 38.4-2341.3 | 444.9 | 520.1  | 303.8-820.2  | 1.38  |
| 3'-SL   | 67.4  | 14.5-206.1  | 28.9  | 63.9   | 46-81.1      | 1.22  |
| 6'-SL   | 113.2 | 9.8-376.9   | 70.8  | 96.6   | 65.5-140.6   | 1.51  |

---

\*The concentration of *N*-glycan and *O*-glycan was LC-MS area corrected by that of an internal standard.

\*\* IQR, interquartile range

Table S2. Normalized concentration of *N*-glycans, *O*-glycans, and HMOs in 200 samples of human milk\*

|                        | range      | SD    | median | IQR**       | skewness |
|------------------------|------------|-------|--------|-------------|----------|
| <u><i>O</i>-glycan</u> |            |       |        |             |          |
| O01                    | 0.028–4.44 | 0.884 | 0.741  | 0.290–1.446 | 1.27     |
| O08                    | 0.005–11.0 | 1.442 | 0.527  | 0.208–1.154 | 3.79     |
| O09                    | 0.191–5.03 | 0.741 | 0.754  | 0.550–1.189 | 2.39     |
| O17                    | 0.029–11.6 | 1.390 | 0.656  | 0.361–1.117 | 4.95     |
| O19                    | 0.023–9.53 | 1.315 | 0.606  | 0.368–1.063 | 4.30     |
| O20                    | 0.013–5.31 | 1.080 | 0.704  | 0.262–1.337 | 1.73     |
| O22                    | 0.098–13.9 | 1.531 | 0.483  | 0.300–1.113 | 4.87     |
| O24                    | 0.014–13.3 | 1.364 | 0.578  | 0.368–1.072 | 5.03     |
| O25                    | 0.016–15.6 | 1.626 | 0.540  | 0.244–1.242 | 5.62     |
| O26                    | 0.067–11.1 | 1.217 | 0.674  | 0.411–1.082 | 4.41     |
| O27                    | 0.056–18.6 | 1.747 | 0.541  | 0.266–1.073 | 6.75     |
| O28                    | 0.011–6.81 | 1.190 | 0.580  | 0.261–1.306 | 2.44     |
| <u><i>N</i>-glycan</u> |            |       |        |             |          |
| N03                    | 0.094–9.71 | 1.229 | 0.555  | 0.323–1.223 | 3.86     |
| N05                    | 0.128–9.67 | 1.257 | 0.575  | 0.397–1.098 | 3.89     |
| N07                    | 0.076–3.55 | 0.77  | 0.828  | 0.434–1.303 | 1.35     |
| N12                    | 0.054–18.8 | 1.929 | 0.502  | 0.225–1.010 | 6.16     |
| N17                    | 0.188–8.01 | 1.022 | 0.715  | 0.427–1.126 | 3.77     |
| N22                    | 0.071–6.30 | 1.095 | 0.572  | 0.298–1.382 | 2.41     |
| N28                    | 0.064–9.63 | 1.002 | 0.798  | 0.499–1.194 | 5.05     |
| N31                    | 0.022–7.86 | 1.168 | 0.587  | 0.295–1.179 | 2.57     |
| N33                    | 0.011–21.7 | 2.523 | 0.073  | 0.039–0.758 | 4.75     |
| N36                    | 0.098–7.37 | 0.987 | 0.704  | 0.485–1.085 | 3.53     |
| N37                    | 0.085–5.25 | 0.823 | 0.740  | 0.492–1.235 | 2.29     |
| N42                    | 0.119–5.34 | 0.806 | 0.773  | 0.529–1.190 | 2.58     |
| N51                    | 0.117–6.82 | 0.955 | 0.706  | 0.490–1.072 | 3.03     |
| N57                    | 0.091–6.70 | 1.034 | 0.699  | 0.368–1.145 | 2.70     |
| N58                    | 0.024–10.4 | 1.42  | 0.556  | 0.257–1.117 | 3.69     |
| N66                    | 0.024–8.37 | 1.258 | 0.556  | 0.278–1.193 | 2.94     |
| <u>HMO</u>             |            |       |        |             |          |
| LNDFH-I                | 0.000–4.46 | 0.815 | 0.990  | 0.110–1.496 | 0.72     |
| LNDFH-II               | 0.070–7.48 | 0.99  | 0.713  | 0.469–1.094 | 3.47     |

|         |            |       |       |             |       |
|---------|------------|-------|-------|-------------|-------|
| LNFP-I  | 0.002–4.48 | 0.952 | 0.768 | 0.258–1.454 | 1.32  |
| LNFP-II | 0.000–7.88 | 1.136 | 0.636 | 0.329–1.229 | 2.62  |
| LDFT    | 0.000–4.59 | 0.822 | 0.956 | 0.393–1.352 | 1.33  |
| LNT     | 0.028–3.57 | 0.643 | 0.901 | 0.557–1.359 | 1.02  |
| LNnT    | 0.063–4.80 | 0.814 | 0.788 | 0.408–1.357 | 1.82  |
| 2'-FL   | 0.000–3.12 | 0.643 | 1.069 | 0.633–1.447 | -0.03 |
| 3-FL    | 0.061–3.74 | 0.712 | 0.832 | 0.486–1.312 | 1.38  |
| 3'-SL   | 0.215–3.06 | 0.429 | 0.948 | 0.683–1.203 | 1.22  |
| 6'-SL   | 0.087–3.33 | 0.625 | 0.854 | 0.578–1.243 | 1.51  |

---

\*The relative concentration of each glycan was normalized to a mean of 1.

\*\* IQR, interquartile range



Table S3. Comparison of the relative concentration of N/O-glycans and HMOs between secretor milk and nonsecretor milk\*

|                | Secretor (n=161) |             | Noneselector (n=39) |             | <i>p</i> value*** |
|----------------|------------------|-------------|---------------------|-------------|-------------------|
|                | median           | IQR**       | median              | IQR         |                   |
| <u>Group A</u> |                  |             |                     |             |                   |
| N07            | 0.823            | 0.434–1.359 | 0.856               | 0.439–1.108 | 0.691             |
| N17            | 0.719            | 0.436–1.168 | 0.675               | 0.333–1.063 | 0.220             |
| N36            | 0.712            | 0.514–1.074 | 0.617               | 0.452–1.088 | 0.484             |
| N37            | 0.698            | 0.465–1.171 | 0.999               | 0.678–1.699 | 0.002             |
| N42            | 0.828            | 0.540–1.257 | 0.619               | 0.419–0.853 | 0.009             |
| N51            | 0.716            | 0.470–1.069 | 0.667               | 0.535–1.045 | 0.841             |
| N57            | 0.673            | 0.363–1.096 | 0.794               | 0.384–1.178 | 0.917             |
| N58            | 0.732            | 0.371–1.259 | 0.178               | 0.084–0.381 | < 0.001           |
| N66            | 0.559            | 0.287–1.188 | 0.553               | 0.265–1.278 | 0.873             |
| N03            | 0.552            | 0.334–1.038 | 0.633               | 0.273–1.959 | 0.498             |
| N05            | 0.571            | 0.397–1.056 | 0.609               | 0.404–1.201 | 0.496             |
| N12            | 0.665            | 0.270–1.120 | 0.251               | 0.179–0.393 | < 0.001           |
| N22            | 0.627            | 0.299–1.388 | 0.501               | 0.274–1.201 | 0.349             |
| N28            | 0.852            | 0.526–1.259 | 0.657               | 0.345–0.878 | 0.006             |
| N31            | 0.515            | 0.267–0.980 | 1.024               | 0.574–1.606 | 0.001             |
| N33            | 0.074            | 0.043–0.914 | 0.056               | 0.033–0.156 | 0.126             |
| LNT            | 0.830            | 0.540–1.290 | 1.049               | 0.719–1.756 | 0.015             |
| LNnT           | 0.883            | 0.563–1.455 | 0.302               | 0.190–0.627 | < 0.001           |
| 3'-SL          | 0.950            | 0.677–1.202 | 0.913               | 0.694–1.219 | 0.948             |
| 6'-SL          | 0.821            | 0.574–1.210 | 0.919               | 0.613–1.299 | 0.423             |
| <u>Group B</u> |                  |             |                     |             |                   |
| 2'-FL          | 1.190            | 0.901–1.534 | 0.006               | 0.004–0.012 | < 0.001           |
| LDFT           | 1.060            | 0.753–1.445 | 0.045               | 0.027–0.075 | < 0.001           |
| LNFP-I         | 0.970            | 0.552–1.621 | 0.037               | 0.021–0.074 | < 0.001           |
| LNDFH-I        | 1.144            | 0.834–1.592 | 0.048               | 0.015–0.099 | < 0.001           |
| O01            | 0.945            | 0.439–1.729 | 0.221               | 0.107–0.612 | < 0.001           |
| O20            | 0.782            | 0.440–1.695 | 0.047               | 0.034–0.087 | < 0.001           |
| O28            | 0.674            | 0.390–1.561 | 0.070               | 0.037–0.261 | < 0.001           |
| <u>Group C</u> |                  |             |                     |             |                   |
| 3-FL           | 0.706            | 0.452–1.087 | 1.993               | 1.268–2.397 | < 0.001           |
| LNFP-II        | 0.582            | 0.320–0.895 | 2.251               | 1.344–3.126 | < 0.001           |

|          |       |             |       |             |         |
|----------|-------|-------------|-------|-------------|---------|
| LNDFH-II | 0.615 | 0.455–0.937 | 1.588 | 0.983–2.921 | < 0.001 |
| O08      | 0.456 | 0.182–0.902 | 1.361 | 0.502–2.468 | < 0.001 |
| O09      | 0.719 | 0.537–1.105 | 0.863 | 0.681–1.859 | 0.014   |
| O17      | 0.667 | 0.370–1.109 | 0.576 | 0.327–1.301 | 0.709   |
| O19      | 0.603 | 0.387–1.007 | 0.609 | 0.348–1.280 | 0.931   |
| O22      | 0.496 | 0.280–1.137 | 0.422 | 0.359–1.100 | 0.542   |
| O24      | 0.525 | 0.314–0.915 | 0.940 | 0.585–1.979 | < 0.001 |
| O25      | 0.506 | 0.251–1.113 | 0.886 | 0.236–1.443 | 0.079   |
| O26      | 0.601 | 0.384–1.012 | 0.837 | 0.572–1.785 | < 0.001 |
| O27      | 0.466 | 0.254–1.002 | 0.727 | 0.512–1.867 | 0.009   |

---

\*The relative concentration of each glycan was normalized to a mean of 1.

\*\*IQR, interquartile range

\*\*\* Mann-Whitney U test
